# Supplementary material
Source: publisher site journal article supplement (https://www.dovepress.com/article/469910)
Supplement: Supplementary file 1 [file get_supplementary_file.php]

**MAMOA – study: Questionnaire 1**

Thank you for participating in the MAMOA study. This questionnaire should be completed before you receive a MEMS® device from your pharmacist. With this questionnaire, we want to collect general data that will allow us to estimate the feasibility of using the MEMS® devices.

**Patient number:**

Please write your individual patient number in this box. You will be given this number by your pharmacist. To ensure your anonymity, it is important to note only this number and NOT your name.

**Date:**

**General data**

What is your gender? M / F / X (delete as appropriate)

What is your age?

What is your height?

What is your body weight?

How would you best describe your living situation?

- Single without resident children
- Single with children living with you
- Living together with partner
- Cohabiting with partner and resident children
- Other, namely:

What is your highest diploma obtained?

- Primary education
- Secondary education
- Higher or university education
- Other, namely:

Which situation corresponds best to your own?

- I do not smoke and have never smoked
- I am an ex-smoker
- I smoke less than 1 packet of cigarettes a day
- I smoke 1 pack or more of cigarettes a day
- Other, namely:

On average, how many servings of alcohol do you drink per week?  *1 serving = 1 glass of wine, 1 glass of beer, 1 glass of spirits, …*

What is your reason for participating in this project?

- Out of interest
- I want to do something for my health
- I want to increase my compliance
- Out of sympathy for my pharmacist
- For another reason, namely:

**Data relating to your health condition**

Do you suffer from hypertension (excessive blood pressure)?

- Yes

*If yes, please indicate which of the following answers corresponds to your situation (multiple answers possible).*

- - My blood pressure is higher than 140/90 mmHg on average
  - My systolic blood pressure (peak pressure) is higher than 160 mmHg on average
  - I am currently being treated with medication for hypertension
- No
- I do not know

Do you suffer from heart failure?

- Yes
- No
- I do not know

Do you suffer from diabetes?

- Yes
- No
- I do not know

Have you had a cerebral infarction (CVA or TIA) in the past?

- Yes 🡪 when?
- No
- I do not know

Have you had a heart attack in the past?

- Yes 🡪 when?
- No
- I do not know

Have you had minor bleedings in the past (nosebleeds, bleeding gums, …)?

- Yes
  - What type of bleeding(s)?
  - When?
  - Frequency (number of times):
- No
- I do not know

Have you had any internal bleeding in the past (brain haemorrhage, stomach haemorraghe, …)?

- Yes
  - What type of bleeding?
  - When?
- No
- I do not know

Do you suffer from anaemia?

- Yes
- No
- I do not know

Do you have impaired kidney function?

*Impaired kidney function means you have a serum creatinine level of ≥ 200 µmol/l, are undergoing dialysis or have undergo a kidney transplant.*

- Yes
- No
- I do not know

Do you have impaired liver function?

*Impaired liver function means that you have chronic liver disease (e.g. cirrhosis) or that you bilirubin level is more than 2x the normal value, combined with an AST, ALT or AF level of at least 3x the upper limit.*

- Yes
- No
- I do not know

Do you consent to request missing data from your GP in the interest of the study?

- Yes
  - Name and contact details of your GP
- No

**Data related to your anticoagulation treatment**

You are participating in this study because you were prescribed one of the ‘direct oral anticoagulants’, a group of drugs used to prevent clot formation.

Which of the following drugs were you prescribed?

- Xarelto®
- Eliquis®
- Lixiana®

The questions below are about the medicine Xarelto®, Eliquis® or Lixiana®:

Since when have you been taking this medicine?

For what reason was this medicine prescribed?

- Because I recently had a knee or hip operation
  - When was the operation?
- Because I have cardiac arrhythmias (atrial fibrillation)
- Because I have already formed a blood clot in the past.
  - When did this clot formation occur?
- Other, namely:
- I do not know

When (and with what frequency) do you take the medicine?
*e.g. 1 tablet twice a day (morning and evening), 1 tablet in the morning, 1 tablet in the evening, …*

Below are a number of statements related to taking Xarelto®, Eliquis® or Lixiana®. For each statement, please indicate which answer applies to you.

|  | **Always** | **Often** | **Sometimes** | **Rarely** | **Never** |
| --- | --- | --- | --- | --- | --- |
| I forget to take my medicine |  |  |  |  |  |
| I change the dosage of my medicine |  |  |  |  |  |
| I stop taking my medicine for a while |  |  |  |  |  |
| I decide to skip taking it |  |  |  |  |  |
| I take less than instructed |  |  |  |  |  |

What are your expectations regarding this project?

- I do not expect this project to affect my compliance
- I expect my compliance to improve
- I expect my compliance to deteriorate

Can you estimate how much time you spent completing this questionnaire?

**MAMOA – study: Questionnaire 2**

To conclude the study you participated in, we would like to ask you a few questions about your personal experiences. As in the previous questionnaires, this data will be processed completely anonymously. You can return this questionnaire by e-mail (sara.desmaele@meduca.be) or hand it in a closed envelope to your pharmacist. Your pharmacist will not have access to your answers.

**Patient number:**

Please write your individual patient number in this box. You will be given this number by your pharmacist. To ensure your anonymity, it is important to note only this number and NOT your name.

**Date:**

Which statement fits you best?

- I think my adherence has not changed compared to before the study.
- I think my adherence has worsened compared to before the study.
- I think my adherence has improved by using the MEMS®-device.
- I think my adherence improved because of the conversation I had with my pharmacist.
- I think my adherence improved because of the combination of the device and the conversations I had with my pharmacist.

Which statement fits you best?

- Taking my medication correctly is entirely my own responsibility, my pharmacist does not have to spend time and energy on this.
- Taking my medicines correctly is entirely my own responsibility, but I appreciate that my pharmacist is willing to guide me in this.
- Taking my medicines correctly is entirely my own responsibility, but I appreciate that my (family) physician should guide me in this.
- Taking my medicines correctly is a shared responsibility (between myself, my GP and my pharmacist).

The MEMS®-devices need to be filled regularly. Which statement suits you best?

- I am willing to come to the pharmacy every 4 weeks to have my MEMS® device refilled, even if I still have enough medication in the original container.
- I am willing to come to the pharmacy every 6 weeks to have my MEMS® device refilled, even if I still have enough medication in the original container.
- I am willing to come to the pharmacy every 8 weeks to have my MEMS® device refilled, even if I still have enough medication in the original container.
- I am willing to come to the pharmacy every 12 weeks to have my MEMS® device refilled, even if I still have enough medication in the original container.
- I am willing to come to the pharmacy to have my MEMS® device refilled only if I need a new pack of the medication.

Rate the following statements. *Put a cross in the appropriate column: do not agree at all – do not agree – agree – fully agree*

|  | **Do not agree at all** | **Do not agree** | **Agree** | **Fully agree** |
| --- | --- | --- | --- | --- |
| I gained a better understanding of my medication use and adherence through discussions with my pharmacist |  |  |  |  |
| My pharmacist can give me more targeted advice and follow-up using the data obtained with the MEMS®-device |  |  |  |  |
| My pharmacist is the most appropriate person to guide me in my therapy adherence |  |  |  |  |
| My (family) physician is the most appropriate person to guide me in my adherence to therapy |  |  |  |  |
| A duo consisting of (GP) doctor and pharmacist is best suited to guide me in my therapy adherence |  |  |  |  |

The MEMS® devices cost quite a bit of money and likewise this service takes time. What amount would you be willing to pay for a similar follow-up?

o Nothing, this should be free for every patient

o A maximum of five (5) euros

o A maximum of twenty (20) euros

o Maximum fifty (50) euros

o Maximum seventy-five (75) euros

o Maximum one hundred (100) euros

Can you estimate how much time you spent completing this questionnaire?

Are there any matters you would like to communicate?
